# Supplementary material for: Microarray-Based Analysis of Methylation of 1st Trimester Trisomic Placentas from Down Syndrome, Edwards Syndrome and Patau Syndrome
Source: PubMed Central journal article supplement (PMC4973974; doi:10.1371/journal.pone.0160319), 2016-08-04

**A** All unmethylated sites (MBC avg. beta < 0.2, ~168K sites)

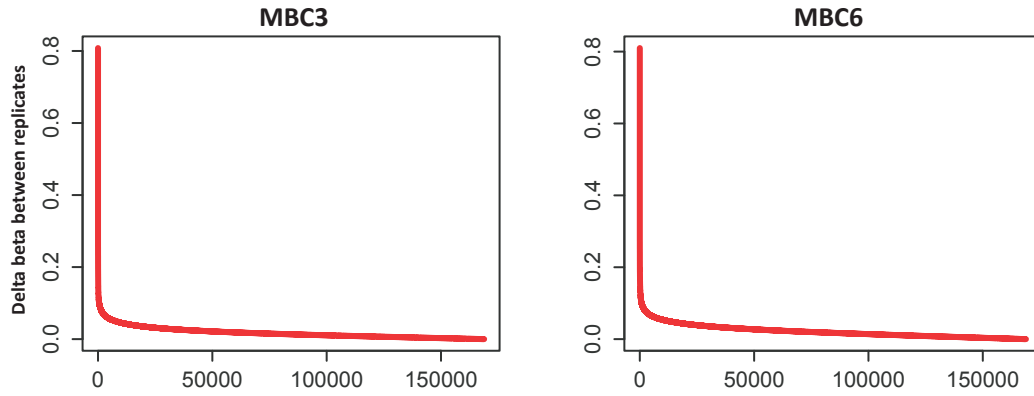

**B** Top 100 highest delta beta, unmethylated sites (avg. beta < 0.2)

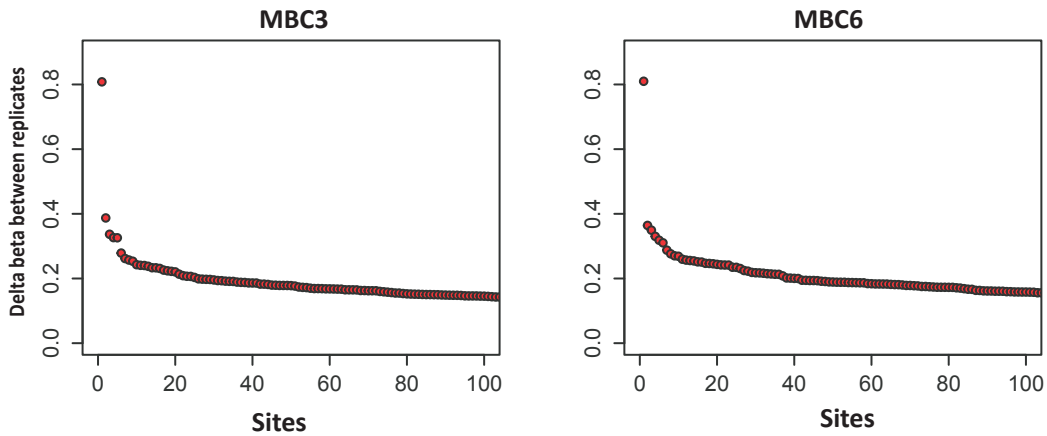

**C** All unmethylated sites (CNOR avg. beta < 0.2, ~150K sites)

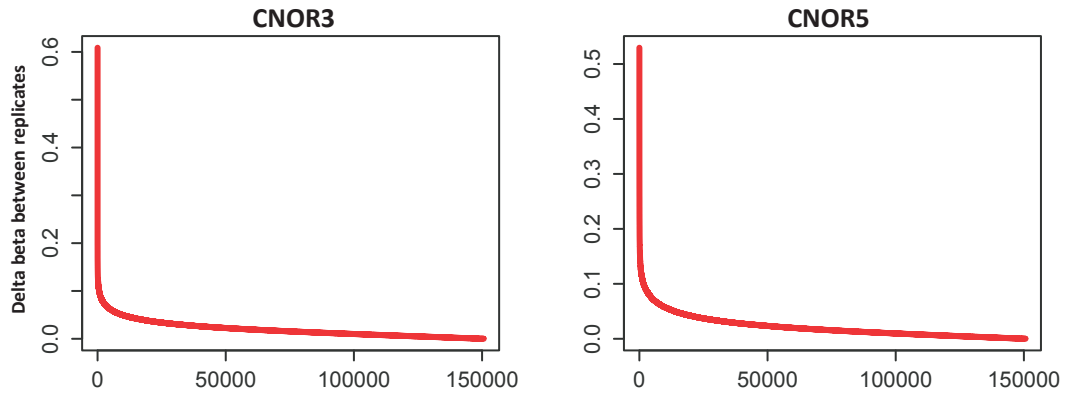

**D** Top 100 highest delta beta, unmethylated sites (avg. beta < 0.2)

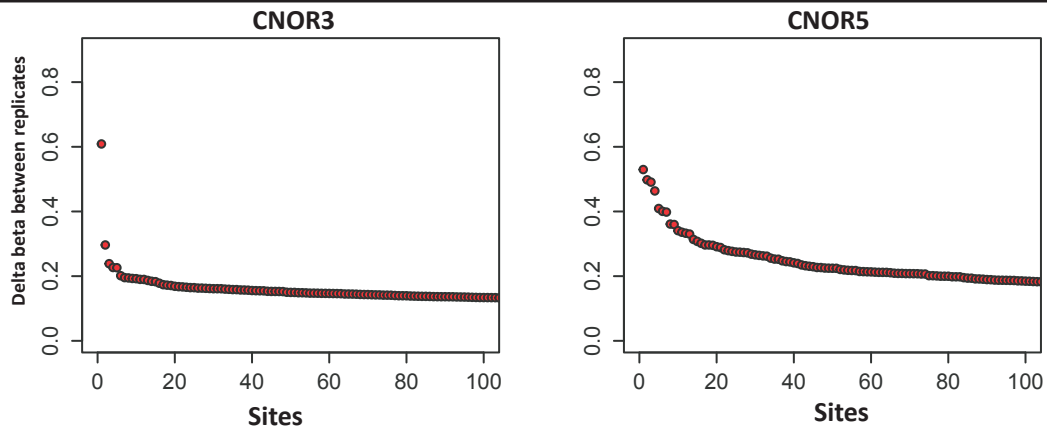

Supplement: pone.0160319.s005.pdf [file pone.0160319.s005.pdf]
