# Supplementary material for: Microarray-Based Analysis of Methylation of 1st Trimester Trisomic Placentas from Down Syndrome, Edwards Syndrome and Patau Syndrome
Source: PubMed Central journal article supplement (PMC4973974; doi:10.1371/journal.pone.0160319), 2016-08-04
Supplement: pone.0160319.s009.pdf [file pone.0160319.s009.pdf]

## Overview of methylation differences for sample replicates

**A** **All methylation sites**

| Sample replicates | # sites $\Delta\beta > 0.1$ | # sites $\Delta\beta > 0.2$ | # sites $\Delta\beta > 0.3$ | # sites $\Delta\beta > 0.4$ |
|-------------------|-----------------------------|-----------------------------|-----------------------------|-----------------------------|
| MBC3              | 7,696 (1.635%)              | 253 (0.054%)                | 32                          | 8                           |
| MBC6              | 11,573 (2.458%)             | 304 (0.066%)                | 32                          | 11                          |
| CNOR3             | 15,616 (3.317%)             | 307 (0.065%)                | 22                          | 10                          |
| CNOR5             | 19,347 (4.11%)              | 1,171 (0.249%)              | 165                         | 36                          |

**B** **Unmethylated sites (avg. beta < 0.2 for MBC or CNOR sample groups)**

| Sample replicates | # sites $\Delta\beta > 0.1$ | # sites $\Delta\beta > 0.2$ | # sites $\Delta\beta > 0.3$ | # sites $\Delta\beta > 0.4$ |
|-------------------|-----------------------------|-----------------------------|-----------------------------|-----------------------------|
| MBC3              | 498 (0.295%)                | 25 (0.015%)                 | 5                           | 1                           |
| MBC6              | 760 (0.45%)                 | 41 (0.024%)                 | 6                           | 1                           |
| CNOR3             | 718 (0.437%)                | 12 (0.007%)                 | 3                           | 1                           |
| CNOR5             | 1,820 (1.108%)              | 106 (0.065%)                | 19                          | 6                           |
