# Supplementary material for: Microarray-Based Analysis of Methylation of 1st Trimester Trisomic Placentas from Down Syndrome, Edwards Syndrome and Patau Syndrome
Source: PLoS One. 2016 Aug 4;11(8):e0160319. doi: 10.1371/journal.pone.0160319 (PMC4973974; doi:10.1371/journal.pone.0160319)
Supplement: S2 Table — Gene functions related to terms within the group “Biological processes”. The table shows the enrichment analysis for the genes associated to our DMCs in T18 samples. The total number of genes within the GO analysis is 17727. Our gene set related to the CVS T18 DMCs were 118. (XLS) [file pone.0160319.s008.xls]

## Sheet: S2 table
GO Term	Description	P-value	FDR q-value	Enrichment	Total no genes	Genes within GO -term	T18 genes related to DMCs	T18 genes within GO - term	Genes
GO:0045944	positive regulation of transcription from RNA polymerase II promoter	1.07E-11	1.37E-07	4.71	17727	861	118	27	[EBF2 - early b-cell factor 2, T - t, brachyury homolog (mouse), PAX9 - paired box 9, PAX7 - paired box 7, SOX17 - sry (sex determining region y)-box 17, NFIC - nuclear factor i/c (ccaat-binding transcription factor), GLI2 - gli family zinc finger 2, HAND2 - heart and neural crest derivatives expressed 2, ZNF750 - zinc finger protein 750, EN2 - engrailed homeobox 2, ETV1 - ets variant 1, SIX3 - s…
GO:1902680	positive regulation of RNA biosynthetic process	1.64E-10	1.05E-06	3.76	17727	1199	118	30	[EBF2 - early b-cell factor 2, T - t, brachyury homolog (mouse), PAX9 - paired box 9, PAX7 - paired box 7, SOX17 - sry (sex determining region y)-box 17, NFIC - nuclear factor i/c (ccaat-binding transcription factor), GLI2 - gli family zinc finger 2, HAND2 - heart and neural crest derivatives expressed 2, ETV1 - ets variant 1, EN2 - engrailed homeobox 2, ZNF750 - zinc finger protein 750, SIX3 - s…
GO:0051254	positive regulation of RNA metabolic process	2.59E-10	1.11E-06	3.69	17727	1222	118	30	[EBF2 - early b-cell factor 2, T - t, brachyury homolog (mouse), PAX9 - paired box 9, PAX7 - paired box 7, SOX17 - sry (sex determining region y)-box 17, NFIC - nuclear factor i/c (ccaat-binding transcription factor), GLI2 - gli family zinc finger 2, HAND2 - heart and neural crest derivatives expressed 2, ETV1 - ets variant 1, EN2 - engrailed homeobox 2, ZNF750 - zinc finger protein 750, SIX3 - s…
GO:0006351	transcription, DNA-templated	3.25E-10	1.05E-06	2.73	17727	2308	118	42	[EBF2 - early b-cell factor 2, OLIG2 - oligodendrocyte lineage transcription factor 2, EYA4 - eyes absent homolog 4 (drosophila), T - t, brachyury homolog (mouse), IRX3 - iroquois homeobox 3, PAX9 - paired box 9, ZNF443 - zinc finger protein 443, SOX17 - sry (sex determining region y)-box 17, PAX7 - paired box 7, CHD5 - chromodomain helicase dna binding protein 5, NFIC - nuclear factor i/c (ccaat…
GO:0097659	nucleic acid-templated transcription	3.25E-10	8.38E-07	2.73	17727	2308	118	42	[EBF2 - early b-cell factor 2, OLIG2 - oligodendrocyte lineage transcription factor 2, EYA4 - eyes absent homolog 4 (drosophila), T - t, brachyury homolog (mouse), IRX3 - iroquois homeobox 3, PAX9 - paired box 9, ZNF443 - zinc finger protein 443, SOX17 - sry (sex determining region y)-box 17, PAX7 - paired box 7, CHD5 - chromodomain helicase dna binding protein 5, NFIC - nuclear factor i/c (ccaat…
GO:2001141	regulation of RNA biosynthetic process	3.60E-10	7.72E-07	2.35	17727	3256	118	51	[T - t, brachyury homolog (mouse), GSC - goosecoid homeobox, PAX9 - paired box 9, PAX7 - paired box 7, SOX17 - sry (sex determining region y)-box 17, HAND2 - heart and neural crest derivatives expressed 2, ZNF735 - zinc finger protein 735, EN2 - engrailed homeobox 2, EBF3 - early b-cell factor 3, PADI4 - peptidyl arginine deiminase, type iv, RAX - retina and anterior neural fold homeobox, ZNF787 …
GO:0006357	regulation of transcription from RNA polymerase II promoter	3.61E-10	6.63E-07	3.33	17727	1487	118	33	[EBF2 - early b-cell factor 2, OLIG2 - oligodendrocyte lineage transcription factor 2, T - t, brachyury homolog (mouse), GSC - goosecoid homeobox, PAX9 - paired box 9, PAX7 - paired box 7, SOX17 - sry (sex determining region y)-box 17, CHD5 - chromodomain helicase dna binding protein 5, NFIC - nuclear factor i/c (ccaat-binding transcription factor), GLI2 - gli family zinc finger 2, HAND2 - heart …
GO:0051171	regulation of nitrogen compound metabolic process	4.43E-10	7.13E-07	2.11	17727	4199	118	59	[T - t, brachyury homolog (mouse), GSC - goosecoid homeobox, PFN2 - profilin 2, PAX9 - paired box 9, SOX17 - sry (sex determining region y)-box 17, PAX7 - paired box 7, HAND2 - heart and neural crest derivatives expressed 2, ZNF735 - zinc finger protein 735, CHN2 - chimerin 2, EN2 - engrailed homeobox 2, EBF3 - early b-cell factor 3, PADI4 - peptidyl arginine deiminase, type iv, RAX - retina and …
GO:0045893	positive regulation of transcription, DNA-templated	4.44E-10	6.35E-07	3.72	17727	1170	118	29	[EBF2 - early b-cell factor 2, T - t, brachyury homolog (mouse), PAX9 - paired box 9, PAX7 - paired box 7, SOX17 - sry (sex determining region y)-box 17, NFIC - nuclear factor i/c (ccaat-binding transcription factor), GLI2 - gli family zinc finger 2, HAND2 - heart and neural crest derivatives expressed 2, ETV1 - ets variant 1, ZNF750 - zinc finger protein 750, EN2 - engrailed homeobox 2, SIX3 - s…
GO:1903508	positive regulation of nucleic acid-templated transcription	4.44E-10	5.72E-07	3.72	17727	1170	118	29	[EBF2 - early b-cell factor 2, T - t, brachyury homolog (mouse), PAX9 - paired box 9, PAX7 - paired box 7, SOX17 - sry (sex determining region y)-box 17, NFIC - nuclear factor i/c (ccaat-binding transcription factor), GLI2 - gli family zinc finger 2, HAND2 - heart and neural crest derivatives expressed 2, ETV1 - ets variant 1, ZNF750 - zinc finger protein 750, EN2 - engrailed homeobox 2, SIX3 - s…
GO:0048518	positive regulation of biological process	5.31E-10	6.22E-07	2.03	17727	4585	118	62	[LMF1 - lipase maturation factor 1, ADRA2C - adrenoceptor alpha 2c, T - t, brachyury homolog (mouse), PFN2 - profilin 2, PAX9 - paired box 9, SOX17 - sry (sex determining region y)-box 17, PAX7 - paired box 7, HAND2 - heart and neural crest derivatives expressed 2, CHN2 - chimerin 2, SEMA6A - sema domain, transmembrane domain (tm), and cytoplasmic domain, (semaphorin) 6a, RIMS2 - regulating synap…
GO:0019219	regulation of nucleobase-containing compound metabolic process	5.74E-10	6.15E-07	2.12	17727	4105	118	58	[T - t, brachyury homolog (mouse), GSC - goosecoid homeobox, PFN2 - profilin 2, PAX9 - paired box 9, SOX17 - sry (sex determining region y)-box 17, PAX7 - paired box 7, HAND2 - heart and neural crest derivatives expressed 2, ZNF735 - zinc finger protein 735, CHN2 - chimerin 2, EN2 - engrailed homeobox 2, EBF3 - early b-cell factor 3, PADI4 - peptidyl arginine deiminase, type iv, RAX - retina and …
GO:0045935	positive regulation of nucleobase-containing compound metabolic process	6.57E-10	6.51E-07	2.96	17727	1880	118	37	[EBF2 - early b-cell factor 2, RASA3 - ras p21 protein activator 3, T - t, brachyury homolog (mouse), PFN2 - profilin 2, PAX9 - paired box 9, SOX17 - sry (sex determining region y)-box 17, PAX7 - paired box 7, ARHGEF10 - rho guanine nucleotide exchange factor (gef) 10, NFIC - nuclear factor i/c (ccaat-binding transcription factor), HAND2 - heart and neural crest derivatives expressed 2, GLI2 - gl…
GO:0048522	positive regulation of cellular process	7.64E-10	7.03E-07	2.11	17727	4134	118	58	[ADRA2C - adrenoceptor alpha 2c, T - t, brachyury homolog (mouse), PFN2 - profilin 2, PAX9 - paired box 9, SOX17 - sry (sex determining region y)-box 17, PAX7 - paired box 7, HAND2 - heart and neural crest derivatives expressed 2, CHN2 - chimerin 2, SEMA6A - sema domain, transmembrane domain (tm), and cytoplasmic domain, (semaphorin) 6a, EN2 - engrailed homeobox 2, RUSC1 - run and sh3 domain cont…
GO:0006355	regulation of transcription, DNA-templated	7.91E-10	6.79E-07	2.34	17727	3216	118	50	[T - t, brachyury homolog (mouse), GSC - goosecoid homeobox, PAX9 - paired box 9, PAX7 - paired box 7, SOX17 - sry (sex determining region y)-box 17, HAND2 - heart and neural crest derivatives expressed 2, ZNF735 - zinc finger protein 735, EN2 - engrailed homeobox 2, EBF3 - early b-cell factor 3, PADI4 - peptidyl arginine deiminase, type iv, RAX - retina and anterior neural fold homeobox, ZNF787 …
GO:0048856	anatomical structure development	9.05E-10	7.28E-07	2.55	17727	2588	118	44	[SLC6A11 - solute carrier family 6 (neurotransmitter transporter), member 11, EBF2 - early b-cell factor 2, OLIG2 - oligodendrocyte lineage transcription factor 2, T - t, brachyury homolog (mouse), GSC - goosecoid homeobox, IRX3 - iroquois homeobox 3, ALK - anaplastic lymphoma receptor tyrosine kinase, PAX9 - paired box 9, SOX17 - sry (sex determining region y)-box 17, PAX7 - paired box 7, PIWIL1…
GO:0051252	regulation of RNA metabolic process	9.12E-10	6.91E-07	2.29	17727	3340	118	51	[T - t, brachyury homolog (mouse), GSC - goosecoid homeobox, PAX9 - paired box 9, PAX7 - paired box 7, SOX17 - sry (sex determining region y)-box 17, HAND2 - heart and neural crest derivatives expressed 2, ZNF735 - zinc finger protein 735, EN2 - engrailed homeobox 2, EBF3 - early b-cell factor 3, PADI4 - peptidyl arginine deiminase, type iv, RAX - retina and anterior neural fold homeobox, ZNF787 …
GO:0051173	positive regulation of nitrogen compound metabolic process	9.80E-10	7.01E-07	2.91	17727	1907	118	37	[EBF2 - early b-cell factor 2, RASA3 - ras p21 protein activator 3, T - t, brachyury homolog (mouse), PFN2 - profilin 2, PAX9 - paired box 9, SOX17 - sry (sex determining region y)-box 17, PAX7 - paired box 7, ARHGEF10 - rho guanine nucleotide exchange factor (gef) 10, NFIC - nuclear factor i/c (ccaat-binding transcription factor), HAND2 - heart and neural crest derivatives expressed 2, GLI2 - gl…
GO:1903506	regulation of nucleic acid-templated transcription	1.03E-09	6.99E-07	2.32	17727	3240	118	50	[T - t, brachyury homolog (mouse), GSC - goosecoid homeobox, PAX9 - paired box 9, PAX7 - paired box 7, SOX17 - sry (sex determining region y)-box 17, HAND2 - heart and neural crest derivatives expressed 2, ZNF735 - zinc finger protein 735, EN2 - engrailed homeobox 2, EBF3 - early b-cell factor 3, PADI4 - peptidyl arginine deiminase, type iv, RAX - retina and anterior neural fold homeobox, ZNF787 …
GO:0032774	RNA biosynthetic process	1.23E-09	7.89E-07	2.57	17727	2510	118	43	[EBF2 - early b-cell factor 2, OLIG2 - oligodendrocyte lineage transcription factor 2, EYA4 - eyes absent homolog 4 (drosophila), T - t, brachyury homolog (mouse), IRX3 - iroquois homeobox 3, PAX9 - paired box 9, ZNF443 - zinc finger protein 443, SOX17 - sry (sex determining region y)-box 17, PAX7 - paired box 7, CHD5 - chromodomain helicase dna binding protein 5, NFIC - nuclear factor i/c (ccaat…
GO:1901362	organic cyclic compound biosynthetic process	1.53E-09	9.40E-07	2.4	17727	2948	118	47	[EBF2 - early b-cell factor 2, OLIG2 - oligodendrocyte lineage transcription factor 2, EYA4 - eyes absent homolog 4 (drosophila), T - t, brachyury homolog (mouse), IRX3 - iroquois homeobox 3, PAX9 - paired box 9, ZNF443 - zinc finger protein 443, SOX17 - sry (sex determining region y)-box 17, PAX7 - paired box 7, CHD5 - chromodomain helicase dna binding protein 5, NFIC - nuclear factor i/c (ccaat…
GO:0045595	regulation of cell differentiation	3.27E-09	1.91E-06	3.41	17727	1276	118	29	[OLIG2 - oligodendrocyte lineage transcription factor 2, ADRA2C - adrenoceptor alpha 2c, IRX3 - iroquois homeobox 3, HIST1H4F - histone cluster 1, h4f, PAX7 - paired box 7, SOX17 - sry (sex determining region y)-box 17, GLI2 - gli family zinc finger 2, HAND2 - heart and neural crest derivatives expressed 2, FAM20C - family with sequence similarity 20, member c, SEMA6A - sema domain, transmembrane…
GO:0010557	positive regulation of macromolecule biosynthetic process	3.57E-09	2e-06	3.3	17727	1365	118	30	[EBF2 - early b-cell factor 2, T - t, brachyury homolog (mouse), PAX9 - paired box 9, PAX7 - paired box 7, SOX17 - sry (sex determining region y)-box 17, NFIC - nuclear factor i/c (ccaat-binding transcription factor), GLI2 - gli family zinc finger 2, HAND2 - heart and neural crest derivatives expressed 2, ETV1 - ets variant 1, EN2 - engrailed homeobox 2, ZNF750 - zinc finger protein 750, SIX3 - s…
GO:0010628	positive regulation of gene expression	3.74E-09	2.01E-06	3.12	17727	1541	118	32	[EBF2 - early b-cell factor 2, T - t, brachyury homolog (mouse), PAX9 - paired box 9, PAX7 - paired box 7, SOX17 - sry (sex determining region y)-box 17, NFIC - nuclear factor i/c (ccaat-binding transcription factor), HAND2 - heart and neural crest derivatives expressed 2, GLI2 - gli family zinc finger 2, RIMS2 - regulating synaptic membrane exocytosis 2, ETV1 - ets variant 1, EN2 - engrailed hom…
GO:0018130	heterocycle biosynthetic process	4.64E-09	2.39E-06	2.39	17727	2831	118	45	[EBF2 - early b-cell factor 2, OLIG2 - oligodendrocyte lineage transcription factor 2, EYA4 - eyes absent homolog 4 (drosophila), T - t, brachyury homolog (mouse), IRX3 - iroquois homeobox 3, PAX9 - paired box 9, ZNF443 - zinc finger protein 443, SOX17 - sry (sex determining region y)-box 17, PAX7 - paired box 7, CHD5 - chromodomain helicase dna binding protein 5, NFIC - nuclear factor i/c (ccaat…
GO:0019438	aromatic compound biosynthetic process	4.85E-09	2.40E-06	2.38	17727	2835	118	45	[EBF2 - early b-cell factor 2, OLIG2 - oligodendrocyte lineage transcription factor 2, EYA4 - eyes absent homolog 4 (drosophila), T - t, brachyury homolog (mouse), IRX3 - iroquois homeobox 3, PAX9 - paired box 9, ZNF443 - zinc finger protein 443, SOX17 - sry (sex determining region y)-box 17, PAX7 - paired box 7, CHD5 - chromodomain helicase dna binding protein 5, NFIC - nuclear factor i/c (ccaat…
GO:0010556	regulation of macromolecule biosynthetic process	4.89E-09	2.33E-06	2.16	17727	3615	118	52	[T - t, brachyury homolog (mouse), GSC - goosecoid homeobox, PAX9 - paired box 9, PAX7 - paired box 7, SOX17 - sry (sex determining region y)-box 17, PIWIL1 - piwi-like rna-mediated gene silencing 1, HAND2 - heart and neural crest derivatives expressed 2, ZNF735 - zinc finger protein 735, EN2 - engrailed homeobox 2, EBF3 - early b-cell factor 3, PADI4 - peptidyl arginine deiminase, type iv, RAX -…
GO:2000112	regulation of cellular macromolecule biosynthetic process	5.57E-09	2.56E-06	2.18	17727	3513	118	51	[T - t, brachyury homolog (mouse), GSC - goosecoid homeobox, PAX9 - paired box 9, PAX7 - paired box 7, SOX17 - sry (sex determining region y)-box 17, PIWIL1 - piwi-like rna-mediated gene silencing 1, HAND2 - heart and neural crest derivatives expressed 2, ZNF735 - zinc finger protein 735, EN2 - engrailed homeobox 2, EBF3 - early b-cell factor 3, PADI4 - peptidyl arginine deiminase, type iv, RAX -…
GO:0034654	nucleobase-containing compound biosynthetic process	7.17E-09	3.18E-06	2.39	17727	2763	118	44	[EBF2 - early b-cell factor 2, OLIG2 - oligodendrocyte lineage transcription factor 2, EYA4 - eyes absent homolog 4 (drosophila), T - t, brachyury homolog (mouse), IRX3 - iroquois homeobox 3, PAX9 - paired box 9, ZNF443 - zinc finger protein 443, SOX17 - sry (sex determining region y)-box 17, PAX7 - paired box 7, CHD5 - chromodomain helicase dna binding protein 5, NFIC - nuclear factor i/c (ccaat…
GO:0044271	cellular nitrogen compound biosynthetic process	8.36E-09	3.59E-06	2.34	17727	2884	118	45	[EBF2 - early b-cell factor 2, OLIG2 - oligodendrocyte lineage transcription factor 2, EYA4 - eyes absent homolog 4 (drosophila), T - t, brachyury homolog (mouse), IRX3 - iroquois homeobox 3, PAX9 - paired box 9, ZNF443 - zinc finger protein 443, SOX17 - sry (sex determining region y)-box 17, PAX7 - paired box 7, CHD5 - chromodomain helicase dna binding protein 5, NFIC - nuclear factor i/c (ccaat…
GO:0031328	positive regulation of cellular biosynthetic process	1.96E-08	8.15E-06	3.07	17727	1470	118	30	[EBF2 - early b-cell factor 2, T - t, brachyury homolog (mouse), PAX9 - paired box 9, PAX7 - paired box 7, SOX17 - sry (sex determining region y)-box 17, NFIC - nuclear factor i/c (ccaat-binding transcription factor), GLI2 - gli family zinc finger 2, HAND2 - heart and neural crest derivatives expressed 2, ETV1 - ets variant 1, EN2 - engrailed homeobox 2, ZNF750 - zinc finger protein 750, SIX3 - s…
GO:0031326	regulation of cellular biosynthetic process	2.15E-08	8.66E-06	2.07	17727	3769	118	52	[T - t, brachyury homolog (mouse), GSC - goosecoid homeobox, PAX9 - paired box 9, PAX7 - paired box 7, SOX17 - sry (sex determining region y)-box 17, PIWIL1 - piwi-like rna-mediated gene silencing 1, HAND2 - heart and neural crest derivatives expressed 2, ZNF735 - zinc finger protein 735, EN2 - engrailed homeobox 2, EBF3 - early b-cell factor 3, PADI4 - peptidyl arginine deiminase, type iv, RAX -…
GO:0050793	regulation of developmental process	2.26E-08	8.80E-06	2.83	17727	1753	118	33	[OLIG2 - oligodendrocyte lineage transcription factor 2, ADRA2C - adrenoceptor alpha 2c, IRX3 - iroquois homeobox 3, HIST1H4F - histone cluster 1, h4f, PAX9 - paired box 9, SOX17 - sry (sex determining region y)-box 17, PAX7 - paired box 7, HAND2 - heart and neural crest derivatives expressed 2, GLI2 - gli family zinc finger 2, SEMA6A - sema domain, transmembrane domain (tm), and cytoplasmic doma…
GO:0009893	positive regulation of metabolic process	2.49E-08	9.41E-06	2.26	17727	2986	118	45	[LMF1 - lipase maturation factor 1, EBF2 - early b-cell factor 2, RASA3 - ras p21 protein activator 3, ADRA2C - adrenoceptor alpha 2c, T - t, brachyury homolog (mouse), PFN2 - profilin 2, ALK - anaplastic lymphoma receptor tyrosine kinase, PAX9 - paired box 9, SOX17 - sry (sex determining region y)-box 17, PAX7 - paired box 7, ARHGEF10 - rho guanine nucleotide exchange factor (gef) 10, NFIC - nuc…
GO:0010604	positive regulation of macromolecule metabolic process	2.60E-08	9.56E-06	2.54	17727	2251	118	38	[EBF2 - early b-cell factor 2, T - t, brachyury homolog (mouse), ADRA2C - adrenoceptor alpha 2c, PFN2 - profilin 2, ALK - anaplastic lymphoma receptor tyrosine kinase, PAX9 - paired box 9, SOX17 - sry (sex determining region y)-box 17, PAX7 - paired box 7, NFIC - nuclear factor i/c (ccaat-binding transcription factor), HAND2 - heart and neural crest derivatives expressed 2, GLI2 - gli family zinc…
GO:0009891	positive regulation of biosynthetic process	2.87E-08	1.03E-05	3.01	17727	1495	118	30	[EBF2 - early b-cell factor 2, T - t, brachyury homolog (mouse), PAX9 - paired box 9, PAX7 - paired box 7, SOX17 - sry (sex determining region y)-box 17, NFIC - nuclear factor i/c (ccaat-binding transcription factor), GLI2 - gli family zinc finger 2, HAND2 - heart and neural crest derivatives expressed 2, ETV1 - ets variant 1, EN2 - engrailed homeobox 2, ZNF750 - zinc finger protein 750, SIX3 - s…
GO:0009889	regulation of biosynthetic process	3.09E-08	1.07E-05	2.05	17727	3808	118	52	[T - t, brachyury homolog (mouse), GSC - goosecoid homeobox, PAX9 - paired box 9, PAX7 - paired box 7, SOX17 - sry (sex determining region y)-box 17, PIWIL1 - piwi-like rna-mediated gene silencing 1, HAND2 - heart and neural crest derivatives expressed 2, ZNF735 - zinc finger protein 735, EN2 - engrailed homeobox 2, EBF3 - early b-cell factor 3, PADI4 - peptidyl arginine deiminase, type iv, RAX -…
GO:0034645	cellular macromolecule biosynthetic process	3.23E-08	1.09E-05	2.31	17727	2793	118	43	[EBF2 - early b-cell factor 2, OLIG2 - oligodendrocyte lineage transcription factor 2, EYA4 - eyes absent homolog 4 (drosophila), T - t, brachyury homolog (mouse), IRX3 - iroquois homeobox 3, PAX9 - paired box 9, ZNF443 - zinc finger protein 443, SOX17 - sry (sex determining region y)-box 17, PAX7 - paired box 7, CHD5 - chromodomain helicase dna binding protein 5, NFIC - nuclear factor i/c (ccaat…
GO:2000026	regulation of multicellular organismal development	3.30E-08	1.09E-05	3.17	17727	1328	118	28	[OLIG2 - oligodendrocyte lineage transcription factor 2, ADRA2C - adrenoceptor alpha 2c, IRX3 - iroquois homeobox 3, HIST1H4F - histone cluster 1, h4f, PAX9 - paired box 9, SOX17 - sry (sex determining region y)-box 17, GLI2 - gli family zinc finger 2, HAND2 - heart and neural crest derivatives expressed 2, FAM20C - family with sequence similarity 20, member c, SEMA6A - sema domain, transmembrane…
GO:0044767	single-organism developmental process	3.66E-08	1.18E-05	2.02	17727	3946	118	53	[SLC6A11 - solute carrier family 6 (neurotransmitter transporter), member 11, KAZN - kazrin, periplakin interacting protein, T - t, brachyury homolog (mouse), GSC - goosecoid homeobox, PAX9 - paired box 9, PAX7 - paired box 7, SOX17 - sry (sex determining region y)-box 17, PIWIL1 - piwi-like rna-mediated gene silencing 1, HAND2 - heart and neural crest derivatives expressed 2, MKI67 - antigen ide…
GO:0045596	negative regulation of cell differentiation	4.43E-08	1.39E-05	4.72	17727	573	118	18	[INSIG1 - insulin induced gene 1, PADI4 - peptidyl arginine deiminase, type iv, PRDM16 - pr domain containing 16, OLIG2 - oligodendrocyte lineage transcription factor 2, SOX9 - sry (sex determining region y)-box 9, HIST1H4F - histone cluster 1, h4f, IRX3 - iroquois homeobox 3, SOX17 - sry (sex determining region y)-box 17, HIST1H4L - histone cluster 1, h4l, NKX6-2 - nk6 homeobox 2, GLI2 - gli fam…
GO:0032502	developmental process	4.58E-08	1.40E-05	1.94	17727	4337	118	56	[SLC6A11 - solute carrier family 6 (neurotransmitter transporter), member 11, KAZN - kazrin, periplakin interacting protein, T - t, brachyury homolog (mouse), GSC - goosecoid homeobox, PAX9 - paired box 9, SOX17 - sry (sex determining region y)-box 17, PAX7 - paired box 7, PIWIL1 - piwi-like rna-mediated gene silencing 1, HAND2 - heart and neural crest derivatives expressed 2, MKI67 - antigen ide…
GO:0031323	regulation of cellular metabolic process	4.79E-08	1.43E-05	1.78	17727	5500	118	65	[LMF1 - lipase maturation factor 1, ADRA2C - adrenoceptor alpha 2c, T - t, brachyury homolog (mouse), GSC - goosecoid homeobox, PFN2 - profilin 2, PAX9 - paired box 9, SOX17 - sry (sex determining region y)-box 17, PAX7 - paired box 7, PIWIL1 - piwi-like rna-mediated gene silencing 1, HAND2 - heart and neural crest derivatives expressed 2, ZNF735 - zinc finger protein 735, CHN2 - chimerin 2, EN2 …
GO:0016070	RNA metabolic process	6.07E-08	1.78E-05	2.17	17727	3186	118	46	[EBF2 - early b-cell factor 2, EYA4 - eyes absent homolog 4 (drosophila), OLIG2 - oligodendrocyte lineage transcription factor 2, CELF5 - cugbp, elav-like family member 5, T - t, brachyury homolog (mouse), IRX3 - iroquois homeobox 3, PAX9 - paired box 9, ZNF443 - zinc finger protein 443, SOX17 - sry (sex determining region y)-box 17, CHD5 - chromodomain helicase dna binding protein 5, PAX7 - pair…
GO:0031325	positive regulation of cellular metabolic process	8.17E-08	2.34E-05	2.28	17727	2773	118	42	[EBF2 - early b-cell factor 2, RASA3 - ras p21 protein activator 3, ADRA2C - adrenoceptor alpha 2c, T - t, brachyury homolog (mouse), PFN2 - profilin 2, ALK - anaplastic lymphoma receptor tyrosine kinase, PAX9 - paired box 9, SOX17 - sry (sex determining region y)-box 17, PAX7 - paired box 7, ARHGEF10 - rho guanine nucleotide exchange factor (gef) 10, NFIC - nuclear factor i/c (ccaat-binding tran…
GO:0009059	macromolecule biosynthetic process	8.90E-08	2.49E-05	2.2	17727	3001	118	44	[EBF2 - early b-cell factor 2, OLIG2 - oligodendrocyte lineage transcription factor 2, EYA4 - eyes absent homolog 4 (drosophila), T - t, brachyury homolog (mouse), IRX3 - iroquois homeobox 3, PAX9 - paired box 9, ZNF443 - zinc finger protein 443, SOX17 - sry (sex determining region y)-box 17, PAX7 - paired box 7, CHD5 - chromodomain helicase dna binding protein 5, NFIC - nuclear factor i/c (ccaat…
GO:0080090	regulation of primary metabolic process	9.97E-08	2.73E-05	1.78	17727	5330	118	63	[LMF1 - lipase maturation factor 1, ADRA2C - adrenoceptor alpha 2c, T - t, brachyury homolog (mouse), GSC - goosecoid homeobox, PFN2 - profilin 2, PAX9 - paired box 9, SOX17 - sry (sex determining region y)-box 17, PAX7 - paired box 7, PIWIL1 - piwi-like rna-mediated gene silencing 1, HAND2 - heart and neural crest derivatives expressed 2, ZNF735 - zinc finger protein 735, CHN2 - chimerin 2, EN2 …
GO:0010468	regulation of gene expression	1.69E-07	4.52E-05	1.93	17727	4123	118	53	[T - t, brachyury homolog (mouse), GSC - goosecoid homeobox, PAX9 - paired box 9, PAX7 - paired box 7, SOX17 - sry (sex determining region y)-box 17, PIWIL1 - piwi-like rna-mediated gene silencing 1, HAND2 - heart and neural crest derivatives expressed 2, ZNF735 - zinc finger protein 735, RIMS2 - regulating synaptic membrane exocytosis 2, EN2 - engrailed homeobox 2, EBF3 - early b-cell factor 3, …
GO:0050794	regulation of cellular process	2.09E-07	5.49E-05	1.44	17727	9287	118	89	[LMF1 - lipase maturation factor 1, RABL5 - rab, member ras oncogene family-like 5, ADRA2C - adrenoceptor alpha 2c, T - t, brachyury homolog (mouse), HIST1H4F - histone cluster 1, h4f, GSC - goosecoid homeobox, PFN2 - profilin 2, PAX9 - paired box 9, SOX17 - sry (sex determining region y)-box 17, PAX7 - paired box 7, PIWIL1 - piwi-like rna-mediated gene silencing 1, HAND2 - heart and neural crest…
GO:0090304	nucleic acid metabolic process	2.41E-07	6.19E-05	2	17727	3683	118	49	[T - t, brachyury homolog (mouse), HIST1H4F - histone cluster 1, h4f, PAX9 - paired box 9, PAX7 - paired box 7, SOX17 - sry (sex determining region y)-box 17, PIWIL1 - piwi-like rna-mediated gene silencing 1, HAND2 - heart and neural crest derivatives expressed 2, ZNF735 - zinc finger protein 735, MKI67 - antigen identified by monoclonal antibody ki-67, EBF3 - early b-cell factor 3, PADI4 - pepti…
GO:0051093	negative regulation of developmental process	2.80E-07	7.06E-05	3.96	17727	721	118	19	[ROBO2 - roundabout, axon guidance receptor, homolog 2 (drosophila), INSIG1 - insulin induced gene 1, PADI4 - peptidyl arginine deiminase, type iv, PRDM16 - pr domain containing 16, OLIG2 - oligodendrocyte lineage transcription factor 2, SOX9 - sry (sex determining region y)-box 9, HIST1H4F - histone cluster 1, h4f, IRX3 - iroquois homeobox 3, SOX17 - sry (sex determining region y)-box 17, HIST1H…
GO:0019222	regulation of metabolic process	3.99E-07	9.88E-05	1.67	17727	5926	118	66	[LMF1 - lipase maturation factor 1, ADRA2C - adrenoceptor alpha 2c, T - t, brachyury homolog (mouse), GSC - goosecoid homeobox, PFN2 - profilin 2, PAX9 - paired box 9, SOX17 - sry (sex determining region y)-box 17, PAX7 - paired box 7, PIWIL1 - piwi-like rna-mediated gene silencing 1, HAND2 - heart and neural crest derivatives expressed 2, ZNF735 - zinc finger protein 735, CHN2 - chimerin 2, RIMS…
GO:0003002	regionalization	6.48E-07	1.57E-04	6.83	17727	242	118	11	[GLI2 - gli family zinc finger 2, HOXD3 - homeobox d3, T - t, brachyury homolog (mouse), GSC - goosecoid homeobox, IRX1 - iroquois homeobox 1, HOXC13 - homeobox c13, SIX3 - six homeobox 3, HOXA10 - homeobox a10, FOXA1 - forkhead box a1, SOX17 - sry (sex determining region y)-box 17, PAX7 - paired box 7]
GO:0060255	regulation of macromolecule metabolic process	8.71E-07	2.08E-04	1.75	17727	4967	118	58	[ADRA2C - adrenoceptor alpha 2c, T - t, brachyury homolog (mouse), GSC - goosecoid homeobox, PFN2 - profilin 2, PAX9 - paired box 9, PAX7 - paired box 7, SOX17 - sry (sex determining region y)-box 17, PIWIL1 - piwi-like rna-mediated gene silencing 1, HAND2 - heart and neural crest derivatives expressed 2, ZNF735 - zinc finger protein 735, RIMS2 - regulating synaptic membrane exocytosis 2, EN2 - e…
GO:0007389	pattern specification process	1.29E-06	3.03E-04	5.21	17727	375	118	13	[RAX - retina and anterior neural fold homeobox, T - t, brachyury homolog (mouse), GSC - goosecoid homeobox, IRX3 - iroquois homeobox 3, IRX1 - iroquois homeobox 1, PAX7 - paired box 7, SOX17 - sry (sex determining region y)-box 17, GLI2 - gli family zinc finger 2, HOXD3 - homeobox d3, HOXC13 - homeobox c13, SIX3 - six homeobox 3, HOXA10 - homeobox a10, FOXA1 - forkhead box a1]
GO:0050767	regulation of neurogenesis	1.31E-06	3.02E-04	4.46	17727	505	118	15	[ROBO2 - roundabout, axon guidance receptor, homolog 2 (drosophila), OLIG2 - oligodendrocyte lineage transcription factor 2, SOX14 - sry (sex determining region y)-box 14, SOX9 - sry (sex determining region y)-box 9, ADRA2C - adrenoceptor alpha 2c, IRX3 - iroquois homeobox 3, NKX6-2 - nk6 homeobox 2, GLI2 - gli family zinc finger 2, HOXD3 - homeobox d3, SEMA6A - sema domain, transmembrane domain …
GO:0006366	transcription from RNA polymerase II promoter	1.77E-06	0.0004	4.67	17727	450	118	14	[OLIG2 - oligodendrocyte lineage transcription factor 2, SOX9 - sry (sex determining region y)-box 9, T - t, brachyury homolog (mouse), SOX14 - sry (sex determining region y)-box 14, PAX7 - paired box 7, CHD5 - chromodomain helicase dna binding protein 5, SOX17 - sry (sex determining region y)-box 17, NFIC - nuclear factor i/c (ccaat-binding transcription factor), KLF13 - kruppel-like factor 13, …
GO:0050789	regulation of biological process	2.14E-06	4.74E-04	1.38	17727	9672	118	89	[LMF1 - lipase maturation factor 1, RABL5 - rab, member ras oncogene family-like 5, ADRA2C - adrenoceptor alpha 2c, T - t, brachyury homolog (mouse), HIST1H4F - histone cluster 1, h4f, GSC - goosecoid homeobox, PFN2 - profilin 2, PAX9 - paired box 9, SOX17 - sry (sex determining region y)-box 17, PAX7 - paired box 7, PIWIL1 - piwi-like rna-mediated gene silencing 1, HAND2 - heart and neural crest…
GO:0006139	nucleobase-containing compound metabolic process	2.34E-06	5.11E-04	1.78	17727	4462	118	53	[T - t, brachyury homolog (mouse), HIST1H4F - histone cluster 1, h4f, PAX9 - paired box 9, PAX7 - paired box 7, SOX17 - sry (sex determining region y)-box 17, PIWIL1 - piwi-like rna-mediated gene silencing 1, HAND2 - heart and neural crest derivatives expressed 2, ZNF735 - zinc finger protein 735, MKI67 - antigen identified by monoclonal antibody ki-67, EBF3 - early b-cell factor 3, PADI4 - pepti…
GO:0009887	organ morphogenesis	2.50E-06	5.36E-04	4.91	17727	398	118	13	[SOX9 - sry (sex determining region y)-box 9, T - t, brachyury homolog (mouse), GSC - goosecoid homeobox, RUNX2 - runt-related transcription factor 2, PAX9 - paired box 9, GLI2 - gli family zinc finger 2, HAND2 - heart and neural crest derivatives expressed 2, NFIC - nuclear factor i/c (ccaat-binding transcription factor), HOXD3 - homeobox d3, SEMA6A - sema domain, transmembrane domain (tm), and …
GO:1901360	organic cyclic compound metabolic process	2.74E-06	5.77E-04	1.73	17727	4869	118	56	[T - t, brachyury homolog (mouse), HIST1H4F - histone cluster 1, h4f, PAX9 - paired box 9, PAX7 - paired box 7, SOX17 - sry (sex determining region y)-box 17, PIWIL1 - piwi-like rna-mediated gene silencing 1, HAND2 - heart and neural crest derivatives expressed 2, ZNF735 - zinc finger protein 735, MKI67 - antigen identified by monoclonal antibody ki-67, EBF3 - early b-cell factor 3, PADI4 - pepti…
GO:0050769	positive regulation of neurogenesis	2.79E-06	5.78E-04	5.88	17727	281	118	11	[ROBO2 - roundabout, axon guidance receptor, homolog 2 (drosophila), GLI2 - gli family zinc finger 2, NKX6-2 - nk6 homeobox 2, HOXD3 - homeobox d3, OLIG2 - oligodendrocyte lineage transcription factor 2, SEMA6A - sema domain, transmembrane domain (tm), and cytoplasmic domain, (semaphorin) 6a, ADRA2C - adrenoceptor alpha 2c, IRX3 - iroquois homeobox 3, ASCL1 - achaete-scute complex homolog 1 (dros…
GO:0001708	cell fate specification	2.86E-06	5.84E-04	15.02	17727	60	118	6	[OLIG2 - oligodendrocyte lineage transcription factor 2, SOX9 - sry (sex determining region y)-box 9, GSC - goosecoid homeobox, FOXA1 - forkhead box a1, ASCL1 - achaete-scute complex homolog 1 (drosophila), SOX17 - sry (sex determining region y)-box 17]
GO:0051241	negative regulation of multicellular organismal process	3e-06	6.03E-04	3.38	17727	845	118	19	[ROBO2 - roundabout, axon guidance receptor, homolog 2 (drosophila), PRDM16 - pr domain containing 16, OLIG2 - oligodendrocyte lineage transcription factor 2, SOX9 - sry (sex determining region y)-box 9, ADRA2C - adrenoceptor alpha 2c, PFN2 - profilin 2, IRX3 - iroquois homeobox 3, HIST1H4F - histone cluster 1, h4f, SOX17 - sry (sex determining region y)-box 17, HIST1H4L - histone cluster 1, h4l,…
GO:0046483	heterocycle metabolic process	3.26E-06	6.46E-04	1.75	17727	4636	118	54	[T - t, brachyury homolog (mouse), HIST1H4F - histone cluster 1, h4f, PAX9 - paired box 9, PAX7 - paired box 7, SOX17 - sry (sex determining region y)-box 17, PIWIL1 - piwi-like rna-mediated gene silencing 1, HAND2 - heart and neural crest derivatives expressed 2, ZNF735 - zinc finger protein 735, MKI67 - antigen identified by monoclonal antibody ki-67, EBF3 - early b-cell factor 3, PADI4 - pepti…
GO:0006725	cellular aromatic compound metabolic process	3.54E-06	6.91E-04	1.75	17727	4648	118	54	[T - t, brachyury homolog (mouse), HIST1H4F - histone cluster 1, h4f, PAX9 - paired box 9, PAX7 - paired box 7, SOX17 - sry (sex determining region y)-box 17, PIWIL1 - piwi-like rna-mediated gene silencing 1, HAND2 - heart and neural crest derivatives expressed 2, ZNF735 - zinc finger protein 735, MKI67 - antigen identified by monoclonal antibody ki-67, EBF3 - early b-cell factor 3, PADI4 - pepti…
GO:0065007	biological regulation	3.93E-06	7.56E-04	1.35	17727	10115	118	91	[SLC6A11 - solute carrier family 6 (neurotransmitter transporter), member 11, LMF1 - lipase maturation factor 1, RABL5 - rab, member ras oncogene family-like 5, ADRA2C - adrenoceptor alpha 2c, T - t, brachyury homolog (mouse), HIST1H4F - histone cluster 1, h4f, GSC - goosecoid homeobox, PFN2 - profilin 2, PAX9 - paired box 9, SOX17 - sry (sex determining region y)-box 17, PAX7 - paired box 7, PIW…
GO:1901576	organic substance biosynthetic process	4.17E-06	7.89E-04	1.84	17727	3917	118	48	[EBF2 - early b-cell factor 2, EYA4 - eyes absent homolog 4 (drosophila), OLIG2 - oligodendrocyte lineage transcription factor 2, T - t, brachyury homolog (mouse), IRX3 - iroquois homeobox 3, PAX9 - paired box 9, ZNF443 - zinc finger protein 443, SOX17 - sry (sex determining region y)-box 17, PAX7 - paired box 7, CHD5 - chromodomain helicase dna binding protein 5, HAND2 - heart and neural crest d…
GO:0044249	cellular biosynthetic process	4.34E-06	8.09E-04	1.86	17727	3800	118	47	[EBF2 - early b-cell factor 2, EYA4 - eyes absent homolog 4 (drosophila), OLIG2 - oligodendrocyte lineage transcription factor 2, T - t, brachyury homolog (mouse), IRX3 - iroquois homeobox 3, PAX9 - paired box 9, ZNF443 - zinc finger protein 443, SOX17 - sry (sex determining region y)-box 17, PAX7 - paired box 7, CHD5 - chromodomain helicase dna binding protein 5, HAND2 - heart and neural crest d…
GO:0051960	regulation of nervous system development	4.97E-06	9.13E-04	4	17727	563	118	15	[ROBO2 - roundabout, axon guidance receptor, homolog 2 (drosophila), OLIG2 - oligodendrocyte lineage transcription factor 2, SOX14 - sry (sex determining region y)-box 14, SOX9 - sry (sex determining region y)-box 9, ADRA2C - adrenoceptor alpha 2c, IRX3 - iroquois homeobox 3, NKX6-2 - nk6 homeobox 2, GLI2 - gli family zinc finger 2, HOXD3 - homeobox d3, SEMA6A - sema domain, transmembrane domain …
GO:0031018	endocrine pancreas development	5.77E-06	1.05E-03	19.26	17727	39	118	5	[NKX6-2 - nk6 homeobox 2, PDX1 - pancreatic and duodenal homeobox 1, SOX9 - sry (sex determining region y)-box 9, PTF1A - pancreas specific transcription factor, 1a, IL6 - interleukin 6 (interferon, beta 2)]
GO:0009653	anatomical structure morphogenesis	6.37E-06	1.14E-03	2.78	17727	1242	118	23	[INSIG1 - insulin induced gene 1, EYA4 - eyes absent homolog 4 (drosophila), T - t, brachyury homolog (mouse), SOX9 - sry (sex determining region y)-box 9, GSC - goosecoid homeobox, RUNX2 - runt-related transcription factor 2, PAX9 - paired box 9, SOX17 - sry (sex determining region y)-box 17, PAX7 - paired box 7, NFIC - nuclear factor i/c (ccaat-binding transcription factor), HAND2 - heart and n…
GO:0032330	regulation of chondrocyte differentiation	6.56E-06	1.16E-03	18.78	17727	40	118	5	[GLI2 - gli family zinc finger 2, SOX9 - sry (sex determining region y)-box 9, RUNX2 - runt-related transcription factor 2, FGF18 - fibroblast growth factor 18, MAF - v-maf avian musculoaponeurotic fibrosarcoma oncogene homolog]
GO:0009058	biosynthetic process	7.02E-06	1.22E-03	1.81	17727	3988	118	48	[EBF2 - early b-cell factor 2, EYA4 - eyes absent homolog 4 (drosophila), OLIG2 - oligodendrocyte lineage transcription factor 2, T - t, brachyury homolog (mouse), IRX3 - iroquois homeobox 3, PAX9 - paired box 9, ZNF443 - zinc finger protein 443, SOX17 - sry (sex determining region y)-box 17, PAX7 - paired box 7, CHD5 - chromodomain helicase dna binding protein 5, HAND2 - heart and neural crest d…
GO:0051962	positive regulation of nervous system development	7.34E-06	1.26E-03	5.31	17727	311	118	11	[ROBO2 - roundabout, axon guidance receptor, homolog 2 (drosophila), GLI2 - gli family zinc finger 2, NKX6-2 - nk6 homeobox 2, HOXD3 - homeobox d3, OLIG2 - oligodendrocyte lineage transcription factor 2, SEMA6A - sema domain, transmembrane domain (tm), and cytoplasmic domain, (semaphorin) 6a, ADRA2C - adrenoceptor alpha 2c, IRX3 - iroquois homeobox 3, ASCL1 - achaete-scute complex homolog 1 (dros…
GO:0060850	regulation of transcription involved in cell fate commitment	8.32E-06	1.41E-03	30.05	17727	20	118	4	[NKX6-2 - nk6 homeobox 2, EVX1 - even-skipped homeobox 1, SOX17 - sry (sex determining region y)-box 17, CHD5 - chromodomain helicase dna binding protein 5]
GO:0045597	positive regulation of cell differentiation	1.06E-05	1.78E-03	3.55	17727	677	118	16	[ROBO2 - roundabout, axon guidance receptor, homolog 2 (drosophila), OLIG2 - oligodendrocyte lineage transcription factor 2, SOX9 - sry (sex determining region y)-box 9, ADRA2C - adrenoceptor alpha 2c, IRX3 - iroquois homeobox 3, RUNX2 - runt-related transcription factor 2, SOX17 - sry (sex determining region y)-box 17, NKX6-2 - nk6 homeobox 2, GLI2 - gli family zinc finger 2, HOXD3 - homeobox d3…
GO:0048731	system development	1.06E-05	1.76E-03	3.55	17727	677	118	16	[ROBO2 - roundabout, axon guidance receptor, homolog 2 (drosophila), SOX14 - sry (sex determining region y)-box 14, SOX9 - sry (sex determining region y)-box 9, T - t, brachyury homolog (mouse), SNTG2 - syntrophin, gamma 2, SOX17 - sry (sex determining region y)-box 17, PAX7 - paired box 7, SLC7A5 - solute carrier family 7 (amino acid transporter light chain, l system), member 5, GLI2 - gli famil…
GO:0048598	embryonic morphogenesis	1.20E-05	1.95E-03	4.6	17727	392	118	12	[INSIG1 - insulin induced gene 1, HAND2 - heart and neural crest derivatives expressed 2, GLI2 - gli family zinc finger 2, HOXD3 - homeobox d3, PDX1 - pancreatic and duodenal homeobox 1, T - t, brachyury homolog (mouse), SOX9 - sry (sex determining region y)-box 9, GSC - goosecoid homeobox, RUNX2 - runt-related transcription factor 2, SIX3 - six homeobox 3, HOXA10 - homeobox a10, SOX17 - sry (sex…
GO:0034641	cellular nitrogen compound metabolic process	1.51E-05	2.43E-03	1.67	17727	4865	118	54	[T - t, brachyury homolog (mouse), HIST1H4F - histone cluster 1, h4f, PAX9 - paired box 9, PAX7 - paired box 7, SOX17 - sry (sex determining region y)-box 17, PIWIL1 - piwi-like rna-mediated gene silencing 1, HAND2 - heart and neural crest derivatives expressed 2, ZNF735 - zinc finger protein 735, MKI67 - antigen identified by monoclonal antibody ki-67, EBF3 - early b-cell factor 3, PADI4 - pepti…
GO:0045664	regulation of neuron differentiation	1.54E-05	2.44E-03	4.48	17727	402	118	12	[ROBO2 - roundabout, axon guidance receptor, homolog 2 (drosophila), GLI2 - gli family zinc finger 2, HOXD3 - homeobox d3, OLIG2 - oligodendrocyte lineage transcription factor 2, ADRA2C - adrenoceptor alpha 2c, SOX9 - sry (sex determining region y)-box 9, IRX3 - iroquois homeobox 3, SIX3 - six homeobox 3, KNDC1 - kinase non-catalytic c-lobe domain (kind) containing 1, IL6 - interleukin 6 (interfe…
GO:0048666	neuron development	1.55E-05	2.43E-03	8.76	17727	120	118	7	[ROBO2 - roundabout, axon guidance receptor, homolog 2 (drosophila), HAND2 - heart and neural crest derivatives expressed 2, GLI2 - gli family zinc finger 2, ETV1 - ets variant 1, EN2 - engrailed homeobox 2, ALK - anaplastic lymphoma receptor tyrosine kinase, ASCL1 - achaete-scute complex homolog 1 (drosophila)]
GO:0044260	cellular macromolecule metabolic process	1.91E-05	2.96E-03	1.56	17727	5981	118	62	[LMF1 - lipase maturation factor 1, T - t, brachyury homolog (mouse), HIST1H4F - histone cluster 1, h4f, PAX9 - paired box 9, SOX17 - sry (sex determining region y)-box 17, PAX7 - paired box 7, PIWIL1 - piwi-like rna-mediated gene silencing 1, HAND2 - heart and neural crest derivatives expressed 2, ZNF735 - zinc finger protein 735, ABO - abo blood group (transferase a, alpha 1-3-n-acetylgalactosa…
GO:0006338	chromatin remodeling	2.24E-05	3.43E-03	8.28	17727	127	118	7	[HIST1H4L - histone cluster 1, h4l, PADI4 - peptidyl arginine deiminase, type iv, SOX9 - sry (sex determining region y)-box 9, HIST1H4F - histone cluster 1, h4f, FOXA1 - forkhead box a1, CHD5 - chromodomain helicase dna binding protein 5, PAX7 - paired box 7]
GO:0061035	regulation of cartilage development	2.43E-05	3.68E-03	14.45	17727	52	118	5	[GLI2 - gli family zinc finger 2, SOX9 - sry (sex determining region y)-box 9, RUNX2 - runt-related transcription factor 2, FGF18 - fibroblast growth factor 18, MAF - v-maf avian musculoaponeurotic fibrosarcoma oncogene homolog]
GO:0010720	positive regulation of cell development	2.52E-05	3.77E-03	4.65	17727	355	118	11	[ROBO2 - roundabout, axon guidance receptor, homolog 2 (drosophila), GLI2 - gli family zinc finger 2, NKX6-2 - nk6 homeobox 2, HOXD3 - homeobox d3, OLIG2 - oligodendrocyte lineage transcription factor 2, SEMA6A - sema domain, transmembrane domain (tm), and cytoplasmic domain, (semaphorin) 6a, ADRA2C - adrenoceptor alpha 2c, IRX3 - iroquois homeobox 3, ASCL1 - achaete-scute complex homolog 1 (dros…
GO:0045165	cell fate commitment	2.87E-05	4.25E-03	7.97	17727	132	118	7	[OLIG2 - oligodendrocyte lineage transcription factor 2, SOX9 - sry (sex determining region y)-box 9, PTF1A - pancreas specific transcription factor, 1a, RUNX2 - runt-related transcription factor 2, ASCL1 - achaete-scute complex homolog 1 (drosophila), IL6 - interleukin 6 (interferon, beta 2), PAX7 - paired box 7]
GO:0060284	regulation of cell development	2.96E-05	4.33E-03	3.44	17727	655	118	15	[ROBO2 - roundabout, axon guidance receptor, homolog 2 (drosophila), OLIG2 - oligodendrocyte lineage transcription factor 2, SOX14 - sry (sex determining region y)-box 14, SOX9 - sry (sex determining region y)-box 9, ADRA2C - adrenoceptor alpha 2c, IRX3 - iroquois homeobox 3, NKX6-2 - nk6 homeobox 2, GLI2 - gli family zinc finger 2, HOXD3 - homeobox d3, SEMA6A - sema domain, transmembrane domain …
GO:0051239	regulation of multicellular organismal process	3.31E-05	4.79E-03	2.15	17727	2095	118	30	[OLIG2 - oligodendrocyte lineage transcription factor 2, ADRA2C - adrenoceptor alpha 2c, PFN2 - profilin 2, IRX3 - iroquois homeobox 3, HIST1H4F - histone cluster 1, h4f, PAX9 - paired box 9, SOX17 - sry (sex determining region y)-box 17, HAND2 - heart and neural crest derivatives expressed 2, GLI2 - gli family zinc finger 2, FAM20C - family with sequence similarity 20, member c, SEMA6A - sema do…
GO:0034728	nucleosome organization	3.32E-05	4.75E-03	7.79	17727	135	118	7	[HIST1H4L - histone cluster 1, h4l, PADI4 - peptidyl arginine deiminase, type iv, HIST1H2BJ - histone cluster 1, h2bj, SOX9 - sry (sex determining region y)-box 9, HIST1H4F - histone cluster 1, h4f, HIST1H2BG - histone cluster 1, h2bg, CHD5 - chromodomain helicase dna binding protein 5]
GO:0042476	odontogenesis	4.36E-05	6.16E-03	9.39	17727	96	118	6	[GLI2 - gli family zinc finger 2, NFIC - nuclear factor i/c (ccaat-binding transcription factor), HAND2 - heart and neural crest derivatives expressed 2, FAM20C - family with sequence similarity 20, member c, RUNX2 - runt-related transcription factor 2, PAX9 - paired box 9]
GO:0048513	organ development	4.42E-05	6.18E-03	2.69	17727	1115	118	20	[SLC6A11 - solute carrier family 6 (neurotransmitter transporter), member 11, ROBO2 - roundabout, axon guidance receptor, homolog 2 (drosophila), PRDM16 - pr domain containing 16, RAX - retina and anterior neural fold homeobox, SOX9 - sry (sex determining region y)-box 9, PTF1A - pancreas specific transcription factor, 1a, IRX3 - iroquois homeobox 3, CACNA1H - calcium channel, voltage-dependent, …
GO:0009888	tissue development	5.63E-05	7.80E-03	3.44	17727	612	118	14	[ROBO2 - roundabout, axon guidance receptor, homolog 2 (drosophila), EBF2 - early b-cell factor 2, SOX9 - sry (sex determining region y)-box 9, T - t, brachyury homolog (mouse), PTF1A - pancreas specific transcription factor, 1a, IRX3 - iroquois homeobox 3, PAX9 - paired box 9, SOX17 - sry (sex determining region y)-box 17, PAX7 - paired box 7, MATK - megakaryocyte-associated tyrosine kinase, FAM…
GO:0048869	cellular developmental process	5.84E-05	0.008	2.05	17727	2269	118	31	[OLIG2 - oligodendrocyte lineage transcription factor 2, EBF2 - early b-cell factor 2, UBD - ubiquitin d, T - t, brachyury homolog (mouse), GSC - goosecoid homeobox, ALK - anaplastic lymphoma receptor tyrosine kinase, SOX17 - sry (sex determining region y)-box 17, CHD5 - chromodomain helicase dna binding protein 5, PAX7 - paired box 7, PIWIL1 - piwi-like rna-mediated gene silencing 1, HAND2 - hea…
GO:0009953	dorsal/ventral pattern formation	6.69E-05	9.06E-03	11.74	17727	64	118	5	[GLI2 - gli family zinc finger 2, GSC - goosecoid homeobox, SIX3 - six homeobox 3, FOXA1 - forkhead box a1, PAX7 - paired box 7]
GO:0071824	protein-DNA complex subunit organization	6.78E-05	9.08E-03	6.96	17727	151	118	7	[HIST1H4L - histone cluster 1, h4l, PADI4 - peptidyl arginine deiminase, type iv, HIST1H2BJ - histone cluster 1, h2bj, SOX9 - sry (sex determining region y)-box 9, HIST1H4F - histone cluster 1, h4f, HIST1H2BG - histone cluster 1, h2bg, CHD5 - chromodomain helicase dna binding protein 5]
GO:0048663	neuron fate commitment	7.41E-05	9.84E-03	17.67	17727	34	118	4	[OLIG2 - oligodendrocyte lineage transcription factor 2, PTF1A - pancreas specific transcription factor, 1a, ASCL1 - achaete-scute complex homolog 1 (drosophila), PAX7 - paired box 7]
GO:0006807	nitrogen compound metabolic process	8.13E-05	1.07E-02	1.57	17727	5279	118	55	[T - t, brachyury homolog (mouse), HIST1H4F - histone cluster 1, h4f, PAX9 - paired box 9, PAX7 - paired box 7, SOX17 - sry (sex determining region y)-box 17, PIWIL1 - piwi-like rna-mediated gene silencing 1, HAND2 - heart and neural crest derivatives expressed 2, ZNF735 - zinc finger protein 735, MKI67 - antigen identified by monoclonal antibody ki-67, EBF3 - early b-cell factor 3, PADI4 - pepti…
GO:0051094	positive regulation of developmental process	8.73E-05	1.13E-02	2.86	17727	894	118	17	[ROBO2 - roundabout, axon guidance receptor, homolog 2 (drosophila), OLIG2 - oligodendrocyte lineage transcription factor 2, ADRA2C - adrenoceptor alpha 2c, SOX9 - sry (sex determining region y)-box 9, IRX3 - iroquois homeobox 3, RUNX2 - runt-related transcription factor 2, SOX17 - sry (sex determining region y)-box 17, HAND2 - heart and neural crest derivatives expressed 2, NKX6-2 - nk6 homeobox…
GO:0030182	neuron differentiation	9.59E-05	1.23E-02	5.59	17727	215	118	8	[HAND2 - heart and neural crest derivatives expressed 2, OLIG2 - oligodendrocyte lineage transcription factor 2, SOX9 - sry (sex determining region y)-box 9, PTF1A - pancreas specific transcription factor, 1a, KNDC1 - kinase non-catalytic c-lobe domain (kind) containing 1, ASCL1 - achaete-scute complex homolog 1 (drosophila), CHD5 - chromodomain helicase dna binding protein 5, PAX7 - paired box 7]
GO:0021904	dorsal/ventral neural tube patterning	9.92E-05	1.26E-02	32.19	17727	14	118	3	[GSC - goosecoid homeobox, FOXA1 - forkhead box a1, PAX7 - paired box 7]
GO:0045666	positive regulation of neuron differentiation	1.02E-04	1.29E-02	5.54	17727	217	118	8	[ROBO2 - roundabout, axon guidance receptor, homolog 2 (drosophila), GLI2 - gli family zinc finger 2, HOXD3 - homeobox d3, ADRA2C - adrenoceptor alpha 2c, IRX3 - iroquois homeobox 3, ASCL1 - achaete-scute complex homolog 1 (drosophila), IL6 - interleukin 6 (interferon, beta 2), FOXA1 - forkhead box a1]
GO:0042475	odontogenesis of dentin-containing tooth	1.03E-04	1.29E-02	10.73	17727	70	118	5	[GLI2 - gli family zinc finger 2, NFIC - nuclear factor i/c (ccaat-binding transcription factor), HAND2 - heart and neural crest derivatives expressed 2, FAM20C - family with sequence similarity 20, member c, RUNX2 - runt-related transcription factor 2]
GO:0006334	nucleosome assembly	1.03E-04	1.28E-02	8.05	17727	112	118	6	[HIST1H4L - histone cluster 1, h4l, PADI4 - peptidyl arginine deiminase, type iv, HIST1H2BJ - histone cluster 1, h2bj, SOX9 - sry (sex determining region y)-box 9, HIST1H4F - histone cluster 1, h4f, HIST1H2BG - histone cluster 1, h2bg]
GO:0008150	biological_process	1.10E-04	1.35E-02	1.11	17727	15758	118	116	[SEC14L1 - sec14-like 1 (s. cerevisiae), LMF1 - lipase maturation factor 1, RABL5 - rab, member ras oncogene family-like 5, KAZN - kazrin, periplakin interacting protein, PAX9 - paired box 9, PAX7 - paired box 7, PIWIL1 - piwi-like rna-mediated gene silencing 1, ZNF735 - zinc finger protein 735, QRFP - pyroglutamylated rfamide peptide, MKI67 - antigen identified by monoclonal antibody ki-67, ABO …
GO:0030154	cell differentiation	1.16E-04	1.41E-02	2.26	17727	1596	118	24	[PRDM16 - pr domain containing 16, EBF2 - early b-cell factor 2, OLIG2 - oligodendrocyte lineage transcription factor 2, UBD - ubiquitin d, SOX9 - sry (sex determining region y)-box 9, T - t, brachyury homolog (mouse), PTF1A - pancreas specific transcription factor, 1a, RUNX2 - runt-related transcription factor 2, SOX17 - sry (sex determining region y)-box 17, PAX7 - paired box 7, CHD5 - chromodo…
GO:0045892	negative regulation of transcription, DNA-templated	1.22E-04	1.47E-02	2.78	17727	919	118	17	[PRDM16 - pr domain containing 16, OLIG2 - oligodendrocyte lineage transcription factor 2, SOX14 - sry (sex determining region y)-box 14, SOX9 - sry (sex determining region y)-box 9, T - t, brachyury homolog (mouse), GSC - goosecoid homeobox, RUNX2 - runt-related transcription factor 2, PAX9 - paired box 9, SOX17 - sry (sex determining region y)-box 17, NFIC - nuclear factor i/c (ccaat-binding tr…
GO:1902866	regulation of retina development in camera-type eye	1.31E-04	1.56E-02	100.15	17727	3	118	2	[PTF1A - pancreas specific transcription factor, 1a, SIX3 - six homeobox 3]
GO:0061074	regulation of neural retina development	1.31E-04	1.55E-02	100.15	17727	3	118	2	[PTF1A - pancreas specific transcription factor, 1a, SIX3 - six homeobox 3]
GO:0021530	spinal cord oligodendrocyte cell fate specification	1.31E-04	1.54E-02	100.15	17727	3	118	2	[OLIG2 - oligodendrocyte lineage transcription factor 2, ASCL1 - achaete-scute complex homolog 1 (drosophila)]
GO:0030855	epithelial cell differentiation	1.33E-04	1.54E-02	4.69	17727	288	118	9	[GLI2 - gli family zinc finger 2, FAM20C - family with sequence similarity 20, member c, PDX1 - pancreatic and duodenal homeobox 1, SOX9 - sry (sex determining region y)-box 9, SIX3 - six homeobox 3, ASCL1 - achaete-scute complex homolog 1 (drosophila), FOXA1 - forkhead box a1, MAF - v-maf avian musculoaponeurotic fibrosarcoma oncogene homolog, SOX17 - sry (sex determining region y)-box 17]
GO:0048468	cell development	1.41E-04	1.62E-02	3.56	17727	506	118	12	[ROBO2 - roundabout, axon guidance receptor, homolog 2 (drosophila), PIWIL1 - piwi-like rna-mediated gene silencing 1, HAND2 - heart and neural crest derivatives expressed 2, GLI2 - gli family zinc finger 2, ETV1 - ets variant 1, EN2 - engrailed homeobox 2, SOX9 - sry (sex determining region y)-box 9, ALK - anaplastic lymphoma receptor tyrosine kinase, RUNX2 - runt-related transcription factor 2,…
GO:0044707	single-multicellular organism process	1.60E-04	1.82E-02	1.82	17727	2976	118	36	[LMF1 - lipase maturation factor 1, EYA4 - eyes absent homolog 4 (drosophila), KAZN - kazrin, periplakin interacting protein, T - t, brachyury homolog (mouse), ADRA2C - adrenoceptor alpha 2c, GSC - goosecoid homeobox, IRX3 - iroquois homeobox 3, IRX1 - iroquois homeobox 1, SOX17 - sry (sex determining region y)-box 17, PAX7 - paired box 7, PIWIL1 - piwi-like rna-mediated gene silencing 1, GLI2 - …
GO:0045638	negative regulation of myeloid cell differentiation	1.72E-04	1.94E-02	9.63	17727	78	118	5	[HIST1H4L - histone cluster 1, h4l, PRDM16 - pr domain containing 16, KLF13 - kruppel-like factor 13, HIST1H4F - histone cluster 1, h4f, HOXA9 - homeobox a9]
GO:1903507	negative regulation of nucleic acid-templated transcription	1.84E-04	2.05E-02	2.69	17727	951	118	17	[PRDM16 - pr domain containing 16, OLIG2 - oligodendrocyte lineage transcription factor 2, SOX14 - sry (sex determining region y)-box 14, SOX9 - sry (sex determining region y)-box 9, T - t, brachyury homolog (mouse), GSC - goosecoid homeobox, RUNX2 - runt-related transcription factor 2, PAX9 - paired box 9, SOX17 - sry (sex determining region y)-box 17, NFIC - nuclear factor i/c (ccaat-binding tr…
GO:0065004	protein-DNA complex assembly	2.15E-04	2.38E-02	7.04	17727	128	118	6	[HIST1H4L - histone cluster 1, h4l, PADI4 - peptidyl arginine deiminase, type iv, HIST1H2BJ - histone cluster 1, h2bj, SOX9 - sry (sex determining region y)-box 9, HIST1H4F - histone cluster 1, h4f, HIST1H2BG - histone cluster 1, h2bg]
GO:0032332	positive regulation of chondrocyte differentiation	2.18E-04	2.40E-02	25.04	17727	18	118	3	[SOX9 - sry (sex determining region y)-box 9, FGF18 - fibroblast growth factor 18, RUNX2 - runt-related transcription factor 2]
GO:1902679	negative regulation of RNA biosynthetic process	2.18E-04	2.38E-02	2.65	17727	965	118	17	[PRDM16 - pr domain containing 16, OLIG2 - oligodendrocyte lineage transcription factor 2, SOX14 - sry (sex determining region y)-box 14, SOX9 - sry (sex determining region y)-box 9, T - t, brachyury homolog (mouse), GSC - goosecoid homeobox, RUNX2 - runt-related transcription factor 2, PAX9 - paired box 9, SOX17 - sry (sex determining region y)-box 17, NFIC - nuclear factor i/c (ccaat-binding tr…
GO:0032501	multicellular organismal process	2.40E-04	2.59E-02	1.78	17727	3036	118	36	[LMF1 - lipase maturation factor 1, EYA4 - eyes absent homolog 4 (drosophila), KAZN - kazrin, periplakin interacting protein, T - t, brachyury homolog (mouse), ADRA2C - adrenoceptor alpha 2c, GSC - goosecoid homeobox, IRX3 - iroquois homeobox 3, IRX1 - iroquois homeobox 1, SOX17 - sry (sex determining region y)-box 17, PAX7 - paired box 7, PIWIL1 - piwi-like rna-mediated gene silencing 1, GLI2 - …
GO:0031327	negative regulation of cellular biosynthetic process	2.42E-04	2.60E-02	2.45	17727	1165	118	19	[INSIG1 - insulin induced gene 1, PRDM16 - pr domain containing 16, OLIG2 - oligodendrocyte lineage transcription factor 2, T - t, brachyury homolog (mouse), SOX14 - sry (sex determining region y)-box 14, SOX9 - sry (sex determining region y)-box 9, GSC - goosecoid homeobox, RUNX2 - runt-related transcription factor 2, PAX9 - paired box 9, SOX17 - sry (sex determining region y)-box 17, NFIC - nuc…
GO:0021953	central nervous system neuron differentiation	2.58E-04	2.74E-02	8.84	17727	85	118	5	[OLIG2 - oligodendrocyte lineage transcription factor 2, KNDC1 - kinase non-catalytic c-lobe domain (kind) containing 1, ASCL1 - achaete-scute complex homolog 1 (drosophila), CHD5 - chromodomain helicase dna binding protein 5, PAX7 - paired box 7]
GO:0072086	specification of loop of Henle identity	2.61E-04	2.76E-02	75.11	17727	4	118	2	[IRX3 - iroquois homeobox 3, IRX1 - iroquois homeobox 1]
GO:0021913	regulation of transcription from RNA polymerase II promoter involved in ventral spinal cord interneuron specification	2.61E-04	2.73E-02	75.11	17727	4	118	2	[NKX6-2 - nk6 homeobox 2, EVX1 - even-skipped homeobox 1]
GO:0009890	negative regulation of biosynthetic process	2.88E-04	2.99E-02	2.42	17727	1181	118	19	[INSIG1 - insulin induced gene 1, PRDM16 - pr domain containing 16, OLIG2 - oligodendrocyte lineage transcription factor 2, T - t, brachyury homolog (mouse), SOX14 - sry (sex determining region y)-box 14, SOX9 - sry (sex determining region y)-box 9, GSC - goosecoid homeobox, RUNX2 - runt-related transcription factor 2, PAX9 - paired box 9, SOX17 - sry (sex determining region y)-box 17, NFIC - nuc…
GO:0002067	glandular epithelial cell differentiation	3.02E-04	3.11E-02	22.53	17727	20	118	3	[PDX1 - pancreatic and duodenal homeobox 1, ASCL1 - achaete-scute complex homolog 1 (drosophila), FOXA1 - forkhead box a1]
GO:0051253	negative regulation of RNA metabolic process	3.12E-04	3.19E-02	2.57	17727	995	118	17	[PRDM16 - pr domain containing 16, OLIG2 - oligodendrocyte lineage transcription factor 2, SOX14 - sry (sex determining region y)-box 14, SOX9 - sry (sex determining region y)-box 9, T - t, brachyury homolog (mouse), GSC - goosecoid homeobox, RUNX2 - runt-related transcription factor 2, PAX9 - paired box 9, SOX17 - sry (sex determining region y)-box 17, NFIC - nuclear factor i/c (ccaat-binding tr…
GO:0010558	negative regulation of macromolecule biosynthetic process	3.89E-04	3.94E-02	2.43	17727	1111	118	18	[PRDM16 - pr domain containing 16, OLIG2 - oligodendrocyte lineage transcription factor 2, T - t, brachyury homolog (mouse), SOX14 - sry (sex determining region y)-box 14, SOX9 - sry (sex determining region y)-box 9, GSC - goosecoid homeobox, RUNX2 - runt-related transcription factor 2, PAX9 - paired box 9, SOX17 - sry (sex determining region y)-box 17, NFIC - nuclear factor i/c (ccaat-binding tr…
GO:1902742	apoptotic process involved in development	4.04E-04	4.06E-02	20.49	17727	22	118	3	[ROBO2 - roundabout, axon guidance receptor, homolog 2 (drosophila), HAND2 - heart and neural crest derivatives expressed 2, SIX3 - six homeobox 3]
GO:0023019	signal transduction involved in regulation of gene expression	4.04E-04	4.03E-02	20.49	17727	22	118	3	[T - t, brachyury homolog (mouse), GSC - goosecoid homeobox, SOX17 - sry (sex determining region y)-box 17]
GO:0044237	cellular metabolic process	4.11E-04	4.07E-02	1.34	17727	8179	118	73	[LMF1 - lipase maturation factor 1, ADRA2C - adrenoceptor alpha 2c, T - t, brachyury homolog (mouse), HIST1H4F - histone cluster 1, h4f, PAX9 - paired box 9, SOX17 - sry (sex determining region y)-box 17, PAX7 - paired box 7, PIWIL1 - piwi-like rna-mediated gene silencing 1, HAND2 - heart and neural crest derivatives expressed 2, ZNF735 - zinc finger protein 735, MKI67 - antigen identified by mon…
GO:0006325	chromatin organization	4.32E-04	4.24E-02	3.15	17727	572	118	12	[HIST1H4L - histone cluster 1, h4l, HIST1H2BD - histone cluster 1, h2bd, PADI4 - peptidyl arginine deiminase, type iv, EYA4 - eyes absent homolog 4 (drosophila), HIST1H2BJ - histone cluster 1, h2bj, ZNF462 - zinc finger protein 462, SOX9 - sry (sex determining region y)-box 9, HIST1H4F - histone cluster 1, h4f, HIST1H2BG - histone cluster 1, h2bg, FOXA1 - forkhead box a1, CHD5 - chromodomain heli…
GO:0061009	common bile duct development	4.34E-04	4.23E-02	60.09	17727	5	118	2	[SOX9 - sry (sex determining region y)-box 9, SOX17 - sry (sex determining region y)-box 17]
GO:0072081	specification of nephron tubule identity	4.34E-04	4.20E-02	60.09	17727	5	118	2	[IRX3 - iroquois homeobox 3, IRX1 - iroquois homeobox 1]
GO:0021780	glial cell fate specification	4.34E-04	4.17E-02	60.09	17727	5	118	2	[OLIG2 - oligodendrocyte lineage transcription factor 2, ASCL1 - achaete-scute complex homolog 1 (drosophila)]
GO:0021778	oligodendrocyte cell fate specification	4.34E-04	4.13E-02	60.09	17727	5	118	2	[OLIG2 - oligodendrocyte lineage transcription factor 2, ASCL1 - achaete-scute complex homolog 1 (drosophila)]
GO:0009952	anterior/posterior pattern specification	4.35E-04	4.12E-02	6.17	17727	146	118	6	[HOXD3 - homeobox d3, T - t, brachyury homolog (mouse), HOXC13 - homeobox c13, SIX3 - six homeobox 3, HOXA10 - homeobox a10, SOX17 - sry (sex determining region y)-box 17]
GO:0051961	negative regulation of nervous system development	4.59E-04	4.31E-02	5.1	17727	206	118	7	[ROBO2 - roundabout, axon guidance receptor, homolog 2 (drosophila), NKX6-2 - nk6 homeobox 2, OLIG2 - oligodendrocyte lineage transcription factor 2, SOX9 - sry (sex determining region y)-box 9, IRX3 - iroquois homeobox 3, SIX3 - six homeobox 3, ASCL1 - achaete-scute complex homolog 1 (drosophila)]
GO:2000113	negative regulation of cellular macromolecule biosynthetic process	5.13E-04	4.78E-02	2.46	17727	1039	118	17	[PRDM16 - pr domain containing 16, OLIG2 - oligodendrocyte lineage transcription factor 2, SOX14 - sry (sex determining region y)-box 14, SOX9 - sry (sex determining region y)-box 9, T - t, brachyury homolog (mouse), GSC - goosecoid homeobox, RUNX2 - runt-related transcription factor 2, PAX9 - paired box 9, SOX17 - sry (sex determining region y)-box 17, NFIC - nuclear factor i/c (ccaat-binding tr…
GO:0061036	positive regulation of cartilage development	5.25E-04	4.87E-02	18.78	17727	24	118	3	[SOX9 - sry (sex determining region y)-box 9, FGF18 - fibroblast growth factor 18, RUNX2 - runt-related transcription factor 2]
GO:0009954	proximal/distal pattern formation	5.25E-04	4.83E-02	18.78	17727	24	118	3	[GLI2 - gli family zinc finger 2, IRX1 - iroquois homeobox 1, HOXA10 - homeobox a10]
GO:0048729	tissue morphogenesis	5.45E-04	4.98E-02	3.87	17727	349	118	9	[HAND2 - heart and neural crest derivatives expressed 2, GLI2 - gli family zinc finger 2, PDX1 - pancreatic and duodenal homeobox 1, T - t, brachyury homolog (mouse), SOX9 - sry (sex determining region y)-box 9, IL6 - interleukin 6 (interferon, beta 2), FOXA1 - forkhead box a1, SOX17 - sry (sex determining region y)-box 17, PAX7 - paired box 7]
GO:0042552	myelination	6.40E-04	5.80E-02	10.19	17727	59	118	4	[PLLP - plasmolipin, ARHGEF10 - rho guanine nucleotide exchange factor (gef) 10, NKX6-2 - nk6 homeobox 2, OLIG2 - oligodendrocyte lineage transcription factor 2]
GO:0060487	lung epithelial cell differentiation	6.68E-04	6.02E-02	17.33	17727	26	118	3	[SOX9 - sry (sex determining region y)-box 9, FOXA1 - forkhead box a1, ASCL1 - achaete-scute complex homolog 1 (drosophila)]
GO:0002009	morphogenesis of an epithelium	6.73E-04	6.02E-02	4.19	17727	287	118	8	[HAND2 - heart and neural crest derivatives expressed 2, GLI2 - gli family zinc finger 2, PDX1 - pancreatic and duodenal homeobox 1, T - t, brachyury homolog (mouse), SOX9 - sry (sex determining region y)-box 9, IL6 - interleukin 6 (interferon, beta 2), FOXA1 - forkhead box a1, SOX17 - sry (sex determining region y)-box 17]
GO:0001501	skeletal system development	6.83E-04	6.06E-02	5.67	17727	159	118	6	[GLI2 - gli family zinc finger 2, FAM20C - family with sequence similarity 20, member c, T - t, brachyury homolog (mouse), SOX9 - sry (sex determining region y)-box 9, HOXA10 - homeobox a10, PAX7 - paired box 7]
GO:0009966	regulation of signal transduction	6.83E-04	6.02E-02	1.9	17727	2134	118	27	[RASA3 - ras p21 protein activator 3, UBD - ubiquitin d, ADRA2C - adrenoceptor alpha 2c, GSC - goosecoid homeobox, ALK - anaplastic lymphoma receptor tyrosine kinase, CHD5 - chromodomain helicase dna binding protein 5, SOX17 - sry (sex determining region y)-box 17, PXDN - peroxidasin homolog (drosophila), HAND2 - heart and neural crest derivatives expressed 2, GLI2 - gli family zinc finger 2, CHN…
GO:0035295	tube development	7.29E-04	6.38E-02	5.6	17727	161	118	6	[ROBO2 - roundabout, axon guidance receptor, homolog 2 (drosophila), GLI2 - gli family zinc finger 2, PDX1 - pancreatic and duodenal homeobox 1, SOX9 - sry (sex determining region y)-box 9, DACT2 - dishevelled-binding antagonist of beta-catenin 2, SOX17 - sry (sex determining region y)-box 17]
GO:0060479	lung cell differentiation	7.48E-04	6.51E-02	16.69	17727	27	118	3	[SOX9 - sry (sex determining region y)-box 9, FOXA1 - forkhead box a1, ASCL1 - achaete-scute complex homolog 1 (drosophila)]
GO:0043170	macromolecule metabolic process	7.50E-04	6.48E-02	1.39	17727	6697	118	62	[LMF1 - lipase maturation factor 1, T - t, brachyury homolog (mouse), HIST1H4F - histone cluster 1, h4f, PAX9 - paired box 9, SOX17 - sry (sex determining region y)-box 17, PAX7 - paired box 7, PIWIL1 - piwi-like rna-mediated gene silencing 1, HAND2 - heart and neural crest derivatives expressed 2, ZNF735 - zinc finger protein 735, MKI67 - antigen identified by monoclonal antibody ki-67, ABO - ab…
GO:0008366	axon ensheathment	7.73E-04	6.63E-02	9.69	17727	62	118	4	[PLLP - plasmolipin, ARHGEF10 - rho guanine nucleotide exchange factor (gef) 10, NKX6-2 - nk6 homeobox 2, OLIG2 - oligodendrocyte lineage transcription factor 2]
GO:0007272	ensheathment of neurons	7.73E-04	6.59E-02	9.69	17727	62	118	4	[PLLP - plasmolipin, ARHGEF10 - rho guanine nucleotide exchange factor (gef) 10, NKX6-2 - nk6 homeobox 2, OLIG2 - oligodendrocyte lineage transcription factor 2]
GO:0016331	morphogenesis of embryonic epithelium	8.34E-04	7.06E-02	16.1	17727	28	118	3	[GLI2 - gli family zinc finger 2, PDX1 - pancreatic and duodenal homeobox 1, T - t, brachyury homolog (mouse)]
GO:0002251	organ or tissue specific immune response	9.26E-04	7.79E-02	15.54	17727	29	118	3	[HIST1H2BJ - histone cluster 1, h2bj, HIST1H2BG - histone cluster 1, h2bg, IL6 - interleukin 6 (interferon, beta 2)]
GO:0000122	negative regulation of transcription from RNA polymerase II promoter	9.53E-04	7.97E-02	2.88	17727	626	118	12	[NFIC - nuclear factor i/c (ccaat-binding transcription factor), GLI2 - gli family zinc finger 2, NKX6-2 - nk6 homeobox 2, PRDM16 - pr domain containing 16, OLIG2 - oligodendrocyte lineage transcription factor 2, PDX1 - pancreatic and duodenal homeobox 1, SOX14 - sry (sex determining region y)-box 14, T - t, brachyury homolog (mouse), GSC - goosecoid homeobox, FOXA1 - forkhead box a1, SOX17 - sry…
GO:0023051	regulation of signaling	9.77E-04	8.12E-02	1.8	17727	2417	118	29	[RASA3 - ras p21 protein activator 3, UBD - ubiquitin d, ADRA2C - adrenoceptor alpha 2c, GSC - goosecoid homeobox, PFN2 - profilin 2, ALK - anaplastic lymphoma receptor tyrosine kinase, SOX17 - sry (sex determining region y)-box 17, CHD5 - chromodomain helicase dna binding protein 5, PXDN - peroxidasin homolog (drosophila), HAND2 - heart and neural crest derivatives expressed 2, GLI2 - gli family…
GO:0010721	negative regulation of cell development	9.98E-04	8.23E-02	4.47	17727	235	118	7	[NKX6-2 - nk6 homeobox 2, OLIG2 - oligodendrocyte lineage transcription factor 2, SOX9 - sry (sex determining region y)-box 9, IRX3 - iroquois homeobox 3, SIX3 - six homeobox 3, ASCL1 - achaete-scute complex homolog 1 (drosophila), FOXA1 - forkhead box a1]
